# Supplementary material
Source: PubMed Central journal article supplement (PMC3416105)
Supplement: JVI.00532-12_zjv999096403so1.pdf [file JVI.00532-12_zjv999096403so1.pdf]

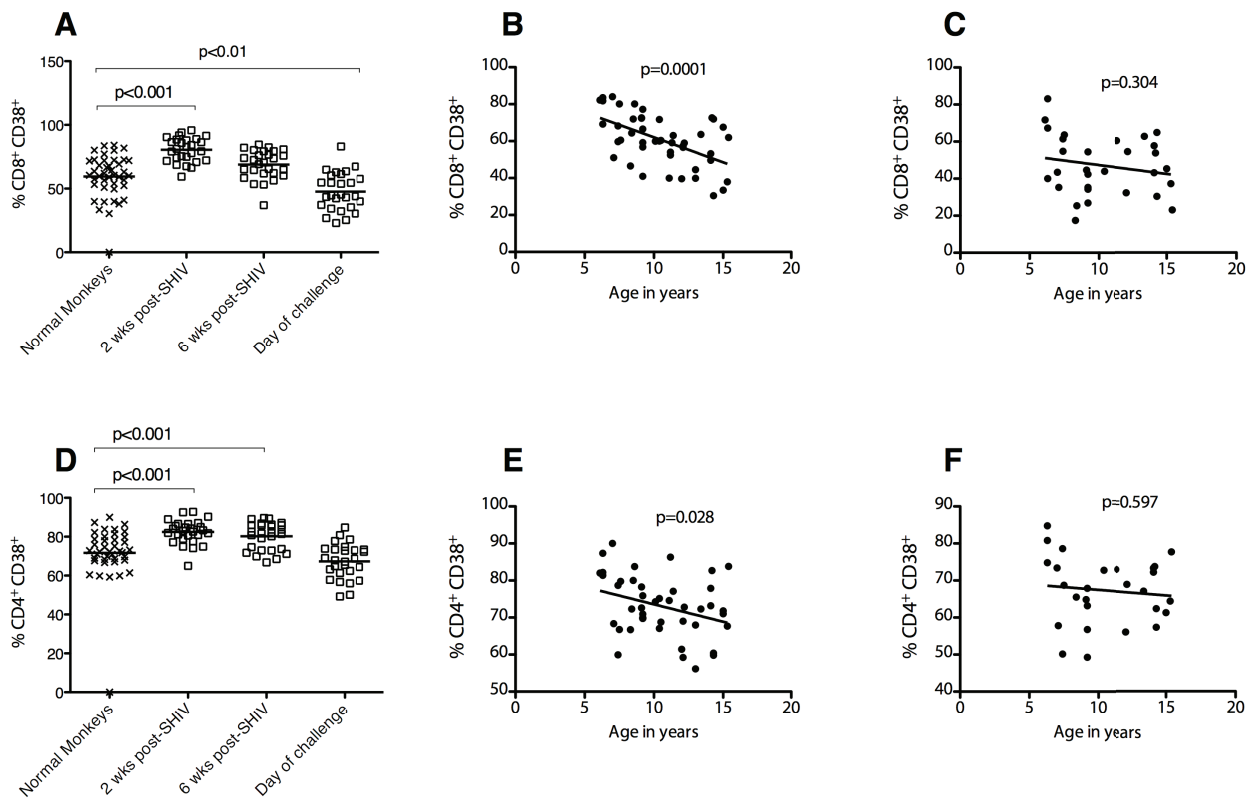

**Supplementary Figure 1. SHIV89.6 immunization decreases the frequency of CD8<sup>+</sup> CD38<sup>+</sup> T cells in blood and abrogates the correlation between CD38 expression on T cells and age in RM.** Flow cytometry was used to determine the percentage of CD38<sup>+</sup> T cells in blood of SHIV-immunized RM from the day of SHIV immunization to the day of SIV challenge (A) CD8<sup>+</sup> T cells and (D) CD4<sup>+</sup> T cells. P values were generated using Tukey's multiple comparison post-hoc test after a one-way ANOVA indicated a significant difference existed among the time points sampled. Each animal is represented by a symbol. Pearson's correlation was used to analyze the degree of association between age and CD38 expression in (B) CD8<sup>+</sup> T cells and (E) CD4<sup>+</sup> T cells of normal monkeys, and in (C) CD8<sup>+</sup> T cells and (F) CD4<sup>+</sup> T cells of SHIV immunized RM on the day of SIV challenge. P values are indicated.

**Supplementary Table 1. Age and Virology of Animals at Necropsy.**

| Group  | Date of necropsy after challenge | Animal ID | Age in years at necropsy | Log10 SIV GAG copy number / ml plasma at necropsy |     |
|--------|----------------------------------|-----------|--------------------------|---------------------------------------------------|-----|
| SHIV   | 0 days                           | 32357     | 6.3                      | 1.7                                               |     |
|        |                                  | 32365     | 6.3                      | 1.7                                               |     |
|        |                                  | 25907     | 15.4                     | 1.7                                               |     |
|        |                                  | 29372     | 10.4                     | 1.7                                               |     |
|        |                                  | 26817     | 14.3                     | 3.5                                               |     |
|        |                                  | 30886     | 8.4                      | 1.7                                               |     |
|        |                                  | 30851     | 9.1                      | 1.6                                               |     |
|        |                                  | 30616     | 9.2                      | 1.5                                               |     |
|        |                                  | 30811     | 9.2                      | 1.7                                               |     |
|        | 3 days                           | 31298     | 8.3                      | 1.4                                               |     |
|        |                                  | 32664     | 6.11                     | 1.5                                               |     |
|        |                                  | 30831     | 9.2                      | 2.8                                               |     |
|        | 7 days                           | 26820     | 14.2                     | 2.1                                               |     |
|        |                                  | 26833     | 14.3                     | 2.7                                               |     |
|        |                                  | 27076     | 14.1                     | 1.7                                               |     |
|        |                                  | 28415     | 12.2                     | 2.3                                               |     |
|        |                                  | 31631     | 7.4                      | 1.9                                               |     |
|        |                                  | 27373     | 13.4                     | 1.7                                               |     |
|        | 14 days                          | 31371     | 7.5                      | 2.2                                               |     |
|        |                                  | 27130     | 14.1                     | 2.3                                               |     |
|        |                                  | 28843     | 11.4                     | 5.1                                               |     |
|        |                                  | 31475     | 7.4                      | 1.7                                               |     |
|        |                                  | 25988     | 15.3                     | 2.2                                               |     |
|        |                                  | 32330     | 6.3                      | 4.0                                               |     |
|        |                                  | 32578     | 7                        | 2.9                                               |     |
|        |                                  | 28850     | 12.1                     | 2.7                                               |     |
|        |                                  | 32427     | 7.1                      | 1.7                                               |     |
|        |                                  | 30906     | 9.2                      | 2.9                                               |     |
|        |                                  | 26960     | 15                       | 3.2                                               |     |
|        |                                  | 30933     | 9.2                      | 1.9                                               |     |
|        | SIV                              | 3 days    | 28257                    | 13                                                | 1.7 |
|        |                                  |           | 29599                    | 10.11                                             | 1.7 |
|        |                                  |           | 28167                    | 13                                                | 1.7 |
| 7 days |                                  | 29612     | 10.5                     | 1.7                                               |     |

|  |         |       |       |     |
|--|---------|-------|-------|-----|
|  |         | 29683 | 10.4  | 1.7 |
|  |         | 30678 | 8.6   | 1.7 |
|  |         | 27768 | 13    | 1.7 |
|  |         | 28953 | 11.1  | 5.3 |
|  |         | 28726 | 11.2  | 1.7 |
|  |         | 30322 | 9.11  | 4.1 |
|  |         | 28752 | 12    | 5.3 |
|  |         | 26715 | 15    | 5.0 |
|  | 14 days | 30946 | 8.5   | 7.3 |
|  |         | 31391 | 7.6   | 6.1 |
|  |         | 32604 | 6.4   | 7.3 |
|  |         | 28629 | 11.3  | 6.9 |
|  |         | 28827 | 11.2  | 6.8 |
|  |         | 28366 | 12.1  | 6.4 |
|  |         | 28630 | 12.1  | 7.4 |
|  |         | 26984 | 14.11 | 7.0 |
|  |         | 29967 | 10.1  | 5.6 |

|  |         |       |       |     |
|--|---------|-------|-------|-----|
|  |         | 29683 | 10.4  | 1.7 |
|  |         | 30678 | 8.6   | 1.7 |
|  |         | 27768 | 13    | 1.7 |
|  |         | 28953 | 11.1  | 5.3 |
|  |         | 28726 | 11.2  | 1.7 |
|  |         | 30322 | 9.11  | 4.1 |
|  |         | 28752 | 12    | 5.3 |
|  |         | 26715 | 15    | 5.0 |
|  | 14 days | 30946 | 8.5   | 7.3 |
|  |         | 31391 | 7.6   | 6.1 |
|  |         | 32604 | 6.4   | 7.3 |
|  |         | 28629 | 11.3  | 6.9 |
|  |         | 28827 | 11.2  | 6.8 |
|  |         | 28366 | 12.1  | 6.4 |
|  |         | 28630 | 12.1  | 7.4 |
|  |         | 26984 | 14.11 | 7.0 |
|  |         | 29967 | 10.1  | 5.6 |

**Supplemental Table 2.** At 3, 7 and 14 days after SIV challenge, chemokine, cytokine and regulatory molecule mRNA levels in tissues of the unimmunized RM (SIV) compared to those of age and gender-matched normal RM (Normal).

| gene         | tissue        | day 3              |       |            |       | day 7              |       |            |       | day 14             |       |            |       |
|--------------|---------------|--------------------|-------|------------|-------|--------------------|-------|------------|-------|--------------------|-------|------------|-------|
|              |               | median $\Delta$ CT |       | modulation | P     | median $\Delta$ CT |       | modulation | P     | median $\Delta$ CT |       | modulation | P     |
|              |               | Normal             | SIV   |            |       | Normal             | SIV   |            |       | Normal             | SIV   |            |       |
| FOXP3        | vagina        | 1.77               | 2.05  |            | 0.795 | 1.77               | 2.13  |            | 0.345 | 1.77               | 3.01  | ↓          | 0.008 |
| granzyme     | axillary LN   | 5.04               | 2.82  |            | 0.095 | 5.04               | 3.54  |            | 0.388 | 5.04               | 2.05  | ↑          | 0.012 |
|              | colon         | 6.75               | 3.8   | ↑          | 0.024 | 6.75               | 4.98  |            | 0.05  | 6.75               | 4.29  | ↑          | 0.005 |
|              | mesenteric LN | 5.24               | 3.77  |            | 0.143 | 5.24               | 4.2   |            | 0.298 | 5.24               | 2.1   | ↑          | 0.012 |
| IFN $\alpha$ | colon         | 14.75              | 15.53 |            | 0.262 | 14.75              | 14.81 |            | 0.68  | 14.75              | 12.15 | ↑          | 0.018 |
|              | vagina        | 15.79              | 15.57 |            | 0.393 | 15.79              | 15.78 |            | 0.35  | 15.79              | 14.36 | ↑          | 0.002 |
| IFN $\gamma$ | axillary LN   | 11.18              | 11.86 |            | 0.571 | 11.18              | 10.15 |            | 0.24  | 11.18              | 7.79  | ↑          | 0.002 |
|              | cervix        | 16.88              | 17.2  |            | 0.393 | 16.88              | 13.38 | ↑          | 0.002 | 16.88              | 11.85 | ↑          | 0.002 |
|              | colon         | 16.56              | 13.88 | ↑          | 0.036 | 16.56              | 13.44 | ↑          | 0.004 | 16.56              | 11.64 | ↑          | 0.002 |
|              | mesenteric LN | 12.48              | 11.04 |            | 0.143 | 12.48              | 9.72  | ↑          | 0.002 | 12.48              | 8.94  | ↑          | 0.007 |
|              | vagina        | 16.74              | 14.52 | ↑          | 0.036 | 16.74              | 13.06 | ↑          | 0.004 | 16.74              | 12.48 | ↑          | 0.004 |
| IL 10        | cervix        | 13.93              | 14.47 |            | 0.571 | 13.93              | 14.41 |            | 0.24  | 13.93              | 11.41 | ↑          | 0.002 |
|              | mesenteric LN | 10.19              | 9.93  |            | 0.548 | 10.19              | 9.19  | ↑          | 0.013 | 10.19              | 8.29  | ↑          | 0.002 |
|              | vagina        | 14.93              | 13.86 |            | 0.25  | 14.93              | 14.83 |            | 0.797 | 14.93              | 12.97 | ↑          | 0.002 |
| IL 12        | iliac LN      | 9.82               | 11.1  |            | 0.548 | 9.82               | 11.57 |            | 0.14  | 9.82               | 13.12 | ↓          | 0.002 |
|              | obturator LN  | 10.23              | 11.15 |            | 0.262 | 10.23              | 11.66 |            | 0.145 | 10.23              | 12.42 | ↓          | 0.003 |
| IL 17        | obturator LN  | 14.64              | 18.74 | ↓          | 0.024 | 14.64              | 18.01 | ↓          | 0.011 | 14.64              | 18.7  | ↓          | 0.002 |
| IL 2         | axillary LN   | 11.02              | 11.42 |            | 0.364 | 11.02              | 12.28 | ↓          | 0.012 | 11.02              | 14.19 | ↓          | 0.002 |
|              | obturator LN  | 9.72               | 11.68 | ↓          | 0.024 | 9.72               | 11.27 | ↓          | 0.008 | 9.72               | 13.59 | ↓          | 0.002 |
| IL 23        | axillary LN   | 9.55               | 10.37 |            | 0.905 | 9.55               | 10.48 |            | 0.113 | 9.55               | 12.66 | ↓          | 0.008 |
|              | obturator LN  | 9.43               | 10.63 |            | 0.167 | 9.43               | 10.33 |            | 0.181 | 9.43               | 11.88 | ↓          | 0.012 |
| IL 29        | axillary LN   | 25                 | 22.38 |            | 0.418 | 25                 | 17.42 | ↑          | 0.036 | 25                 | 15.15 | ↑          | 0.002 |
|              | cervix        | 25                 | 25    |            | 0.377 | 25                 | 21.05 | ↑          | 0.024 | 25                 | 17.77 | ↑          | 0.002 |
|              | colon         | 25                 | 21.75 |            | 0.123 | 25                 | 20.24 | ↑          | 0.014 | 25                 | 17.87 | ↑          | 0.006 |
|              | iliac LN      | 25                 | 20.68 | ↑          | 0.017 | 25                 | 16.97 | ↑          | 0.007 | 25                 | 16.06 | ↑          | 0.003 |
|              | obturator LN  | 22.28              | 21.92 |            | 0.897 | 22.28              | 20.03 |            | 0.168 | 22.28              | 14.63 | ↑          | 0.002 |
|              | vagina        | 23.7               | 25    |            | 0.22  | 23.7               | 22.12 |            | 0.096 | 23.7               | 16.72 | ↑          | 0.008 |
| IL 4         | axillary LN   | 12.47              | 14.52 | ↓          | 0.028 | 12.47              | 14.39 | ↓          | 0.004 | 12.47              | 15.87 | ↓          | 0.002 |
|              | iliac LN      | 12.23              | 15.8  | ↓          | 0.024 | 12.23              | 13.54 | ↓          | 0.034 | 12.23              | 15.05 | ↓          | 0.003 |
|              | mesenteric LN | 11.61              | 12.75 | ↓          | 0.036 | 11.61              | 12.28 |            | 0.161 | 11.61              | 13.33 | ↓          | 0.002 |
|              | obturator LN  | 12.54              | 15.81 | ↓          | 0.024 | 12.54              | 13.56 | ↓          | 0.012 | 12.54              | 15.08 | ↓          | 0.002 |
| IL 6         | vagina        | 14.04              | 13.3  |            | 0.629 | 14.04              | 14.36 |            | 0.825 | 14.04              | 12.03 | ↑          | 0.007 |
| IL 8         | mesenteric LN | 15.71              | 15.31 |            | 0.714 | 15.71              | 16.31 |            | 0.662 | 15.71              | 18.19 | ↓          | 0.018 |
|              | obturator LN  | 13.89              | 18.16 | ↓          | 0.036 | 13.89              | 16.33 | ↓          | 0.029 | 13.89              | 18.38 | ↓          | 0.002 |
| IP 10        | axillary LN   | 16.55              | 17.56 |            | 0.154 | 16.55              | 16.43 |            | 0.953 | 16.55              | 13.77 | ↑          | 0.006 |
|              | cervix        | 19.93              | 23    | ↓          | 0.032 | 19.93              | 20.5  |            | 0.423 | 19.93              | 16.12 | ↑          | 0.002 |

| gene          | tissue        | day 3              |       |                 |       | day 7              |       |                 |       | day 14             |       |                 |       |
|---------------|---------------|--------------------|-------|-----------------|-------|--------------------|-------|-----------------|-------|--------------------|-------|-----------------|-------|
|               |               | median $\Delta$ CT |       | modu-<br>lation | P     | median $\Delta$ CT |       | modu-<br>lation | P     | median $\Delta$ CT |       | modu-<br>lation | P     |
|               |               | Normal             | SIV   |                 |       | Normal             | SIV   |                 |       | Normal             | SIV   |                 |       |
| IP 10         | colon         | 21.09              | 19.14 |                 | 0.629 | 21.09              | 19.06 |                 | 0.148 | 21.09              | 17.61 | ↑               | 0.003 |
|               | iliac LN      | 16.59              | 17.05 |                 | 0.714 | 16.59              | 16.38 |                 | 0.388 | 16.59              | 12.55 | ↑               | 0.018 |
|               | vagina        | 19.55              | 20.79 |                 | 0.381 | 19.55              | 19.65 |                 | 0.409 | 19.55              | 15.35 | ↑               | 0.008 |
| IRF 7         | axillary LN   | 8.73               | 7.13  |                 | 0.095 | 8.73               | 5.96  | ↑               | 0.036 | 8.73               | 4.37  | ↑               | 0.005 |
|               | cervix        | 9.72               | 10.04 |                 | 0.897 | 9.72               | 7.58  |                 | 0.111 | 9.72               | 6.2   | ↑               | 0.002 |
|               | iliac LN      | 7.8                | 7.24  |                 | 0.099 | 7.8                | 4.92  | ↑               | 0.016 | 7.8                | 4.79  | ↑               | 0.002 |
|               | vagina        | 9.45               | 10.62 | ↓               | 0.024 | 9.45               | 9.21  |                 | 0.328 | 9.45               | 6.14  | ↑               | 0.002 |
| LARC          | iliac LN      | 4.83               | 5.99  |                 | 0.571 | 4.83               | 7.74  | ↓               | 0.019 | 4.83               | 7.47  | ↓               | 0.007 |
| MDA 5         | cervix        | 9.07               | 10.92 | ↓               | 0.024 | 9.07               | 7.48  | ↑               | 0.003 | 9.07               | 5.92  | ↑               | 0.005 |
|               | colon         | 9.05               | 10.09 |                 | 0.548 | 9.05               | 7.7   | ↑               | 0.002 | 9.05               | 5.36  | ↑               | 0.002 |
|               | iliac LN      | 7.12               | 7.49  |                 | 0.167 | 7.12               | 6.04  | ↑               | 0.036 | 7.12               | 4.44  | ↑               | 0.003 |
|               | mesenteric LN | 7.46               | 6.47  |                 | 0.167 | 7.46               | 5.86  | ↑               | 0.012 | 7.46               | 4.14  | ↑               | 0.003 |
|               | vagina        | 8.73               | 8.52  |                 | 0.262 | 8.73               | 7.7   | ↑               | 0.026 | 8.73               | 5.46  | ↑               | 0.011 |
| MIG           | axillary LN   | 5.93               | 6.86  | ↓               | 0.048 | 5.93               | 6.22  |                 | 0.479 | 5.93               | 3.49  | ↑               | 0.005 |
|               | mesenteric LN | 7.07               | 6.35  |                 | 0.905 | 7.07               | 5.83  |                 | 0.181 | 7.07               | 4.05  | ↑               | 0.012 |
|               | vagina        | 9.56               | 10.4  |                 | 0.381 | 9.56               | 10.9  |                 | 0.113 | 9.56               | 7.19  | ↑               | 0.018 |
| MIP 1 $\beta$ | iliac LN      | 3.32               | 5.02  | ↓               | 0.024 | 3.32               | 4.62  | ↓               | 0.008 | 3.32               | 4.8   | ↓               | 0.008 |
| Mx            | axillary LN   | 6.85               | 4.23  | ↑               | 0.048 | 6.85               | 1.73  | ↑               | 0.002 | 6.85               | -0.23 | ↑               | 0.002 |
|               | cervix        | 5.2                | 4.34  |                 | 0.262 | 5.2                | 1.69  | ↑               | 0.026 | 5.2                | 0.87  | ↑               | 0.002 |
|               | colon         | 6.91               | 6.63  |                 | 0.548 | 6.91               | 3.87  | ↑               | 0.026 | 6.91               | 0.87  | ↑               | 0.002 |
|               | mesenteric LN | 4.93               | 5.14  |                 | 0.714 | 4.93               | 1.57  | ↑               | 0.018 | 4.93               | -0.6  | ↑               | 0.012 |
|               | obturator LN  | 4.89               | 4.78  |                 | 1     | 4.89               | -0.19 |                 | 0.112 | 4.89               | 0.34  | ↑               | 0.012 |
|               | vagina        | 4.83               | 5.28  |                 | 0.099 | 4.83               | 3.95  |                 | 0.438 | 4.83               | 0.64  | ↑               | 0.002 |
| OAS           | axillary LN   | 10.02              | 8.79  |                 | 0.143 | 10.02              | 7.17  | ↑               | 0.007 | 10.02              | 5.33  | ↑               | 0.007 |
|               | cervix        | 9.04               | 9.16  |                 | 0.393 | 9.04               | 8.23  |                 | 0.364 | 9.04               | 6.2   | ↑               | 0.004 |
|               | colon         | 7.14               | 6.97  |                 | 0.437 | 7.14               | 5.28  |                 | 0.05  | 7.14               | 4.7   | ↑               | 0.002 |
|               | mesenteric LN | 8.57               | 8.89  |                 | 0.653 | 8.57               | 7.11  | ↑               | 0.042 | 8.57               | 4.41  | ↑               | 0.012 |
|               | vagina        | 8.57               | 8.69  |                 | 0.786 | 8.57               | 8.63  |                 | 0.797 | 8.57               | 5.89  | ↑               | 0.012 |
| perforin      | axillary LN   | 9.01               | 4.19  |                 | 0.167 | 9.01               | 4.37  |                 | 0.157 | 9.01               | 3.84  | ↑               | 0.011 |
|               | colon         | 8.63               | 7.29  | ↑               | 0.024 | 8.63               | 8.43  |                 | 0.388 | 8.63               | 6.74  | ↑               | 0.004 |
|               | mesenteric LN | 5.13               | 4.97  |                 | 0.604 | 5.13               | 4.76  |                 | 0.181 | 5.13               | 3.87  | ↑               | 0.002 |
|               | vagina        | 7.44               | 5.97  | ↑               | 0.036 | 7.44               | 7.08  |                 | 0.147 | 7.44               | 5.93  | ↑               | 0.004 |
| RIG 1         | colon         | 9.24               | 11.31 |                 | 0.548 | 9.24               | 7.84  | ↑               | 0.007 | 9.24               | 4.6   | ↑               | 0.002 |
|               | iliac LN      | 6.95               | 8.06  |                 | 0.095 | 6.95               | 6     |                 | 0.216 | 6.95               | 3.77  | ↑               | 0.018 |
|               | mesenteric LN | 7.42               | 7.13  |                 | 0.381 | 7.42               | 6.13  | ↑               | 0.003 | 7.42               | 3.7   | ↑               | 0.005 |
|               | vagina        | 8.51               | 7.69  |                 | 0.095 | 8.37               | 6.89  | ↑               | 0.003 | 8.37               | 5.11  | ↑               | 0.016 |
| siglec 3      | axillary LN   | 7.34               | 7.74  |                 | 0.517 | 7.34               | 7.87  |                 | 0.86  | 7.34               | 8.95  | ↑               | 0.016 |
|               | cervix        | 13.58              | 13.38 |                 | 0.786 | 13.58              | 11.46 |                 | 0.147 | 13.58              | 10.79 | ↑               | 0.007 |
|               | vagina        | 14.79              | 12.79 | ↑               | 0.048 | 14.79              | 13.87 |                 | 0.181 | 14.79              | 13.22 | ↑               | 0.012 |
| siglec 5      | cervix        | 11.27              | 11.45 |                 | 0.786 | 11.27              | 9.66  | ↑               | 0.029 | 11.27              | 7.97  | ↑               | 0.002 |
|               | colon         | 10.55              | 8.96  |                 | 0.548 | 10.55              | 9.49  |                 | 0.224 | 10.55              | 8.84  | ↑               | 0.012 |

| gene            | tissue        | day 3              |       |                 |       | day 7              |       |                 |       | day 14             |      |                 |       |
|-----------------|---------------|--------------------|-------|-----------------|-------|--------------------|-------|-----------------|-------|--------------------|------|-----------------|-------|
|                 |               | median $\Delta$ CT |       | modu-<br>lation | P     | median $\Delta$ CT |       | modu-<br>lation | P     | median $\Delta$ CT |      | modu-<br>lation | P     |
|                 |               | Normal             | SIV   |                 |       | Normal             | SIV   |                 |       | Normal             | SIV  |                 |       |
| siglec 5        | iliac LN      | 16.72              | 6.64  | ↑               | 0.048 | 9.28               | 6.5   | ↑               | 0.012 | 9.28               | 7.43 | ↑               | 0.005 |
|                 | mesenteric LN | 8.18               | 6.75  |                 | 0.381 | 8.18               | 6.86  |                 | 0.066 | 8.18               | 6.15 | ↑               | 0.012 |
|                 | vagina        | 11.37              | 10.07 | ↑               | 0.024 | 11.37              | 10.52 | ↑               | 0.05  | 11.37              | 9.37 | ↑               | 0.002 |
| TGF $\beta$     | axillary LN   | 6.78               | 3.77  |                 | 0.057 | 6.78               | 4.02  | ↑               | 0.034 | 6.78               | 4.16 | ↑               | 0.003 |
|                 | cervix        | 5.37               | 4.51  |                 | 0.25  | 5.37               | 4.88  |                 | 0.147 | 5.37               | 5.05 | ↑               | 0.009 |
| TRIM 5 $\alpha$ | colon         | 9.23               | 9.69  |                 | 0.697 | 9.23               | 7.9   | ↑               | 0.039 | 9.23               | 6.74 | ↑               | 0.016 |
|                 | mesenteric LN | 7.61               | 6.58  |                 | 0.262 | 7.61               | 5.65  | ↑               | 0.002 | 7.61               | 5.33 | ↑               | 0.003 |
|                 | vagina        | 9.08               | 7.39  | ↑               | 0.024 | 9.08               | 7.16  | ↑               | 0.003 | 9.08               | 6.61 | ↑               | 0.008 |
| VISA            | vagina        | 9.91               | 9.09  |                 | 0.095 | 9.91               | 9.59  |                 | 0.315 | 9.91               | 9.22 | ↑               | 0.012 |
